# 1 A simple hierarchical model for 2 heterogeneity in the evolutionary 3 correlation on a phylogenetic tree

4 Liam J. Revell<sup>1,2</sup>, Ken S. Toyama<sup>3</sup>, and D. Luke Mahler<sup>3</sup>

5 <sup>1</sup>Department of Biology, University of Massachusetts Boston, Boston, Massachusetts  
6 02125

7 <sup>2</sup>Facultad de Ciencias, Universidad Católica de la Santísima Concepción, Concepción,  
8 Chile

9 <sup>3</sup>Department of Ecology & Evolutionary Biology, University of Toronto, Toronto, Ontario  
10 M5S 3B2, Canada

11 Corresponding author:

12 Liam J. Revell<sup>1,2</sup>

13 Email address: [liam.revell@umb.edu](mailto:liam.revell@umb.edu)

## 14 ABSTRACT

15 Numerous questions in phylogenetic comparative biology revolve around the correlated evolution of two  
16 or more phenotypic traits on a phylogeny. In many cases, it may be sufficient to assume a constant  
17 value for the evolutionary correlation between characters across all the clades and branches of the tree.  
18 Under other circumstances, however, it's desirable or necessary to account for the possibility that the  
19 evolutionary correlation differs through time or in different sections of the phylogeny. Here, we present  
20 a method designed to fit a hierarchical series of models for heterogeneity in the evolutionary rates and  
21 correlation of two quantitative traits on a phylogenetic tree. We apply the method to two datasets: one for  
22 different attributes of the buccal morphology in sunfishes (Centrarchidae); and a second for overall body  
23 length and relative body depth in rock- and non rock-dwelling South American iguanian lizards. We also  
24 examine the performance of the method for model selection using a small set of numerical simulations.

## 25 INTRODUCTION

26 The evolutionary correlation is defined as the tendency of two phenotypic characteristics to co-evolve  
27 over evolutionary time or on a phylogenetic tree (Felsenstein, 1985; Revell and Collar, 2009; O'Meara,  
28 2012; Harmon, 2019). Lots of hypotheses about evolution that are tested using phylogenetic comparative  
29 methods involve the evolutionary correlation between traits. For instance, when Garland et al. (1992)  
30 tested the hypothesis of a correlation between phylogenetically independent contrasts (Felsenstein, 1985)  
31 for home range size and body mass in mammals, they were really asking if evolutionary increases in body  
32 size tend to be associated with increases in home range size, as well as the converse. In effect, they asked  
33 if the two traits were *evolutionarily correlated*. Likewise, when Ruiz-Robledo and Villar (2005) used  
34 phylogenetic contrasts to explore the relationship between relative growth rate and leaf longevity in woody  
35 plants, they were in fact investigating the tendency of these two traits to co-evolve on the phylogeny. They  
36 were measuring the evolutionary correlation between different phenotypic characteristics of plant leaves  
37 (Ruiz-Robledo and Villar, 2005).

38 Most analyses of the evolutionary correlation assume that the tendency of traits to co-evolve is constant  
39 over all of the branches and clades of the phylogeny. Revell and Collar (2009), however, proposed a  
40 new (at the time) likelihood-based method for testing a hypothesis of a discrete shift in the evolutionary  
41 correlation or correlations between two or more traits in certain predefined parts of the phylogeny.  
42 According to this method, which was a relatively simple multivariate extension of an important related  
43 approach by O'Meara et al. (2006; also see Thomas et al., 2006; Revell and Harmon, 2008), the rate of  
44 evolution for individual traits, *and* the evolutionary correlation between them, were free to vary between  
45 different *regimes* mapped onto the phylogeny by the user. Revell and Collar (2009) applied the method to

46 a phylogeny and dataset for the buccal morphology of sunfishes (Centrarchidae) to test the hypothesis that  
47 the evolutionary tendency of gape width and buccal length to co-evolve was affected by feeding mode.

48 Revell and Collar's (2009) approach is implemented in the *phytools* R package (Revell, 2012) and has  
49 been applied to various questions since its original publication. For instance, Damian-Serrano et al. (2021)  
50 used the method to test whether the evolutionary correlation between different aspects of the prey  
51 capture apparatus in siphonophore hydrozoans changes as a function of the type of prey they consume.  
52 The method has also been updated or adapted in different ways (e.g., Clavel et al., 2015; Caetano and  
53 Harmon, 2017). For example, Clavel et al. (2015) developed software for modeling multivariate evolution,  
54 but with different types of constraints on the evolutionary rates or correlations between traits; and Caetano  
55 and Harmon (2017) implemented an extension of Revell and Collar (2009) that uses Bayesian MCMC for  
56 estimation, instead of maximum likelihood.

57 The underlying model of Revell and Collar (2009) is multivariate Brownian motion (Felsenstein, 1985;  
58 Revell and Harmon, 2008; Harmon, 2019). Brownian motion is a continuous time stochastic diffusion  
59 process in which the *variance* that accumulates between diverging lineages is proportional to the time  
60 since they shared a common ancestor (O'Meara et al., 2006; Revell and Harmon, 2008; Revell, 2021). The  
61 amount of *covariance* between species related by the tree is a direct function of the distance above the root  
62 of their most recent ancestor. At the tips of the tree, species values for a trait,  $x$ , are anticipated to have a  
63 multivariate normal distribution with a mean equal to the value at the root node of the phylogeny, and a  
64 variance-covariance matrix equal to  $\sigma^2\mathbf{C}$  in which  $\mathbf{C}$  is an  $n \times n$  matrix (for  $n$  total taxa) that contains the  
65 height above the root node of the common ancestor of each  $i,j$ th species pair for  $i \neq j$ ; and the total length  
66 of the tree from the root to each  $i$ th tip, otherwise (O'Meara et al., 2006; Revell et al., 2008).

67 In the case of multivariate Brownian motion, the diffusion process can no longer be described by a  
68 single parameter,  $\sigma^2$ . Now, Brownian motion evolution is governed by an  $m \times m$  matrix, for  $m$  traits,  
69 sometimes referred to as the *evolutionary rate matrix* (Revell and Harmon, 2008; Revell and Collar, 2009;  
70 Caetano and Harmon, 2017). An example of a simple,  $2 \times 2$  Brownian evolutionary rate matrix is given by  
71 equation (1).

$$\mathbf{R} = \begin{bmatrix} \sigma_1^2 & \sigma_{1,2} \\ \sigma_{2,1} & \sigma_2^2 \end{bmatrix} \quad (1)$$

72 In this expression,  $\sigma_1^2$  and  $\sigma_2^2$  are the instantaneous variances, or Brownian motion *rates* (O'Meara  
73 et al., 2006), for traits 1 and 2, respectively. Meanwhile  $\sigma_{1,2}$  (and  $\sigma_{2,1}$  – which always has the same value;  
74 i.e.,  $\mathbf{R}$  is a symmetric matrix) is the instantaneous *covariance* of the traits 1 and 2 (Revell and Harmon,  
75 2008). The evolutionary correlation between traits 1 and 2, in turn, is calculated as follows.

$$r = \frac{\sigma_{1,2}}{\sqrt{\sigma_1^2 \sigma_2^2}} \quad (2)$$

76 Alternatively then, of course, equation (1) can be recomposed and expressed uniquely in terms of  $r$ ,  
77  $\sigma_1$ , and  $\sigma_2$ .

$$\mathbf{R} = \begin{bmatrix} \sigma_1^2 & r\sigma_1\sigma_2 \\ r\sigma_2\sigma_1 & \sigma_2^2 \end{bmatrix} \quad (3)$$

78 The primary innovation of Revell and Collar (2009), as well as related methods (such as Adams,  
79 2013; Clavel et al., 2015; Caetano and Harmon, 2017), was to permit the instantaneous evolutionary  
80 variances and covariances of the Brownian motion process to differ in different parts of the tree that had  
81 been specified *a priori* by the investigator. Figure 1 shows just this type of analysis for a phylogeny  
82 of Centrarchidae (sunfishes), a discrete pair of evolutionary regimes (feeding mode: piscivorous or  
83 non-piscivorous), and a quantitative phenotypic trait dataset comprised of two different attributes of the  
84 feeding morphology: relative gape width and relative buccal length (Collar et al., 2005; Revell and Collar,  
85 2009). Panel 1a gives the phylogeny with a hypothesis about how the evolutionary regime (feeding mode)  
86 may have evolved on the tree. Panel 1b shows the phylogeny projected into the trait space. Finally, panel  
87 1c shows the results of fitted one and two Brownian evolutionary rate matrix models (Figure 1).

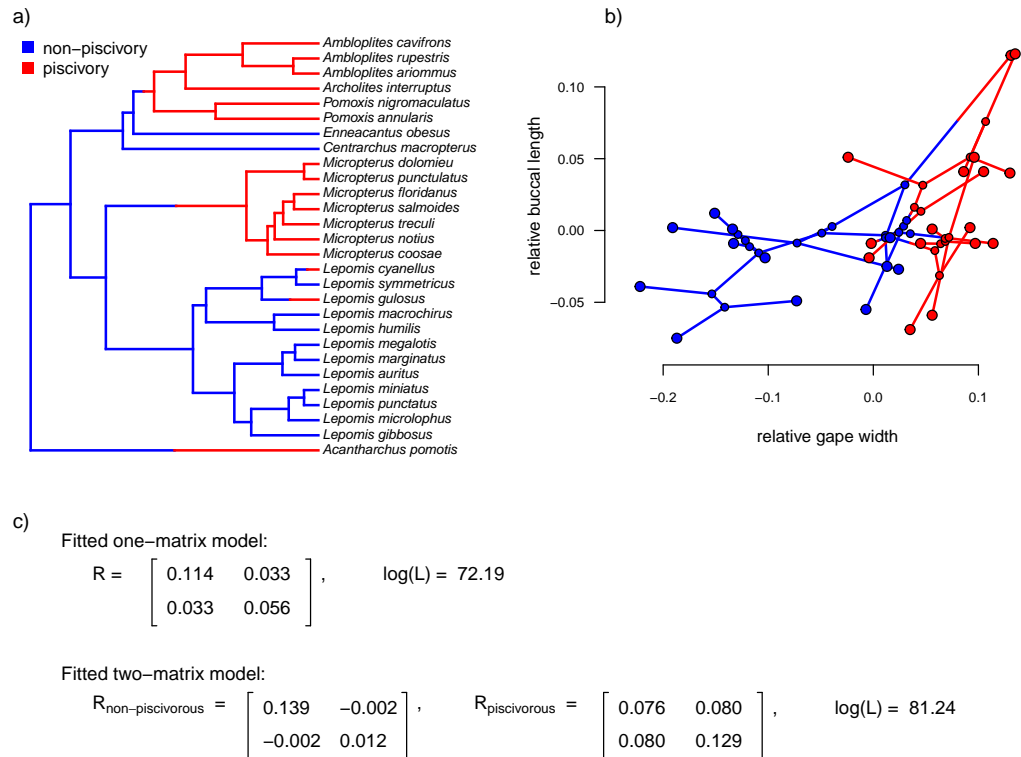

**Figure 1.** a) Phylogeny of centrarchid fishes with feeding mode (piscivory or non-piscivory) mapped onto the edges of the tree. b) Projection of the tree in (a) into a phenotypic trait space defined by different aspects of the mouth morphology in Centrarchidae. c) Fitted two-matrix evolutionary model. The evolutionary covariance between relative gape width and buccal length is higher in piscivorous compared to non-piscivorous fishes, and this model fits significantly better than a model in which the evolutionary covariance is assumed to be equal for the two regimes. Note that although this analysis is similar to the one that accompanied Revell and Collar (2009), here we've used a slightly different set of taxa and a different mapping of regimes onto the phylogeny. The phylogenetic tree is modified from Near et al. (2005).

88 The simpler of these two models, with only one value for the evolutionary variance-covariance matrix  
 89 of the Brownian process, contains a total of five parameters to be estimated:  $\sigma_1^2$  and  $\sigma_2^2$  for the two  
 90 traits;  $\sigma_{1,2}$ , the evolutionary covariance (or, in the equivalent reparameterization given by equation (3),  $r$ );  
 91 and ancestral values at the root node for each trait (O'Meara et al., 2006; Hohenlohe and Arnold, 2008;  
 92 Revell and Collar, 2009). By contrast, the more complex model of Figure 1c contains a total of eight  
 93 estimated parameters:  $\sigma_1^2$ ,  $\sigma_2^2$ ,  $\sigma_{1,2}$  for each of two modeled regimes (non-piscivory and piscivory), plus  
 94 two ancestral states at the root.

95 Based on an approximately 8.1 log-likelihood unit difference between the two fitted models of our  
 96 example (Figure 1), we would conclude that the two-matrix model significantly better explains the trait  
 97 data than a model in which the evolutionary rates (variances) and covariances are constant across all the  
 98 edges and clades of the phylogeny ( $P < 0.001$ ; Revell and Collar, 2009). We obtain a similar result if we  
 99 use information theoretic model selection (such as the Akaike Information Criterion, AIC, see below;  
 100 Akaike, 1974) instead of likelihood-ratio hypothesis testing. Looking specifically at the evolutionary  
 101 correlation ( $r$ ), based on equation (2), above, we estimate that the correlation changes from being very  
 102 slightly *negative* ( $r = -0.05$ ) in non-piscivorous taxa, to quite strongly *positive* in their piscivorous kin  
 103 ( $r = 0.80$ ). This is consistent with stronger selection for functional integration of the different elements of  
 104 the feeding apparatus in piscivorous vs. non-piscivorous lineages (Collar et al., 2005; Revell and Collar,

105 2009).

106 This analysis is implemented in the *phytools* (Revell, 2012) software library for the R statistical  
107 computing environment (R Core Team, 2021).

## 108 METHODS AND RESULTS

### 109 A hierarchical set of models

110 One obvious limitation of the approach illustrated in Figure 1 is that it only considers two possible  
111 alternative models for the evolutionary variance-covariance matrix among traits: one in which both the  
112 evolutionary variances and the evolutionary correlation are constant; and a second in which the two  
113 mapped regimes have no similarity in evolutionary process for the two traits (Figure 1c). In fact, it's  
114 possible to identify a number of different alternative models between these two extremes.

115 Table 1 lists a total of *eight* alternative models (our original two models, from above, and six others).  
116 In square parentheses after each model, we've also provided the alphanumeric code that's been used to  
117 denominate the different models in the *phytools* (Revell, 2012) R software function *evolvcv.lite* where  
118 these models have been implemented.

**Table 1.** Model description, model parameter estimates, log-likelihood,  $\log(L)$ , and AIC for one homogeneous and seven heterogeneous rate or correlation multivariate Brownian evolution models fit to the data of Figure 1.  $\sigma_{i,j}^2$  gives the instantaneous variance of the Brownian process (evolutionary rate) for the  $i$ th trait and  $j$ th regime. (Note that this is a different use of subscripts as compared to equation (1) in which only traits, and not regimes, were being indicated.)  $r_j$  gives the evolutionary correlation between traits 1 and 2 for evolutionary regime  $j$ . In the table, regime 1 is non-piscivory and regime 2 is piscivorous feeding mode; while trait 1 is relative gape width and trait 2 is relative buccal length (Figure 1). The best-supported model using AIC as our model selection criterion (highlighted in bold font) is model 3c: different rates for trait 2, different correlations.

| Model description                                                | $\sigma_{1,1}^2$ | $\sigma_{1,2}^2$ | $\sigma_{2,1}^2$ | $\sigma_{2,2}^2$ | $r_1$       | $r_2$       | $\log(L)$   | AIC           |
|------------------------------------------------------------------|------------------|------------------|------------------|------------------|-------------|-------------|-------------|---------------|
| common rates,<br>common correlation [1]                          | 0.11             | –                | 0.056            | –                | 0.41        | –           | 72.2        | -134.4        |
| different rates,<br>common correlation                           | 0.18             | 0.05             | 0.02             | 0.09             | 0.45        | –           | 78.0        | -142.0        |
| different rates (trait 1),<br>common correlation [2b]            | 0.20             | 0.04             | 0.06             | –                | 0.55        | –           | 76.0        | -140.0        |
| different rates (trait 2),<br>common correlation [2c]            | 0.11             | –                | 0.02             | 0.10             | 0.33        | –           | 75.3        | -138.7        |
| common rates,<br>different correlation [3]                       | 0.10             | –                | 0.06             | –                | 0.16        | 0.68        | 73.6        | -135.2        |
| different rates (trait 1),<br>different correlation [3b]         | 0.17             | 0.05             | 0.06             | –                | 0.36        | 0.65        | 76.5        | -139.0        |
| <b>different rates (trait 2),<br/>different correlation [3c]</b> | <b>0.11</b>      | <b>–</b>         | <b>0.01</b>      | <b>0.16</b>      | <b>0.00</b> | <b>0.85</b> | <b>80.7</b> | <b>-147.4</b> |
| no common structure [4]                                          | 0.14             | 0.08             | 0.01             | 0.13             | -0.05       | 0.80        | 81.2        | -146.5        |

119 The eight models of Table 1 are as follows: model (1) common rates, common correlation; model (2)  
120 different rates, common correlation; model (2b) different rates for trait 1 only, common correlation; model  
121 (2c) different rates for trait 2 only, common correlation; model (3) common rates, different correlation;

122 model (3b) different rates for trait 1 only, different correlation; model (3c) different rates for trait 2 only,  
 123 different correlation; finally, model (4) no common structure between the two different evolutionary  
 124 variance-covariance matrices of the multivariate Brownian process.

125 When we analyze this complete set of models for our centrarchid dataset of Figure 1, we find that  
 126 the best *fitting* model (that is, the model with the highest log-likelihood) is the no common structure  
 127 model in which the Brownian evolutionary variance-covariance matrix is free to differ in all possible  
 128 ways depending on the mapped regime. It is, in fact, a logical necessity that model 4 has a log-likelihood  
 129 that's greater than or equal to the next best model. This is because model 4, our no common structure  
 130 model, has all of our other seven models as special cases. On the other hand, the best *supported* model  
 131 (that is, the model that's best-justified by our data taking into account model complexity; Burnham and  
 132 Anderson, 2002) is model 3c (different rates in trait 2, relative buccal length, different correlations; Table  
 133 1), indicated with bold font in the table.

134 Note that some other software, such as the *mvMORPH* R package of Clavel et al. (2015), also fits  
 135 alternative models for multivariate Brownian evolution – such as a model in which the rate of evolution for  
 136 different traits or for different regimes are constrained to be equal, or a model in which the evolutionary  
 137 correlation between traits,  $r$ , is constrained to be 0.

### 138 **An empirical example: South American rock- and non rock-dwelling lizards**

139 In addition to the centrarchid data, above, we also applied the method to a morphological dataset of  
 140 South American iguanian lizards (members of the lizard family Tropiduridae *sensu lato*; Toyama, 2017).  
 141 For this example, we mapped habitat use of rock-dwelling vs. non rock-dwelling (Revell et al., 2007;  
 142 Goodman et al., 2008) on a phylogeny of 76 lizard species. Our phylogeny was obtained from Pyron et al.  
 143 (2013), but pruned to contain only the taxa of the present study, and rescaled to have a total length of 1.0.  
 144 (We rescaled the tree to unit length merely so that our parameter wouldn't need to be represented using  
 145 scientific notation. Relative model fits should be completely unaffected by this rescaling.)

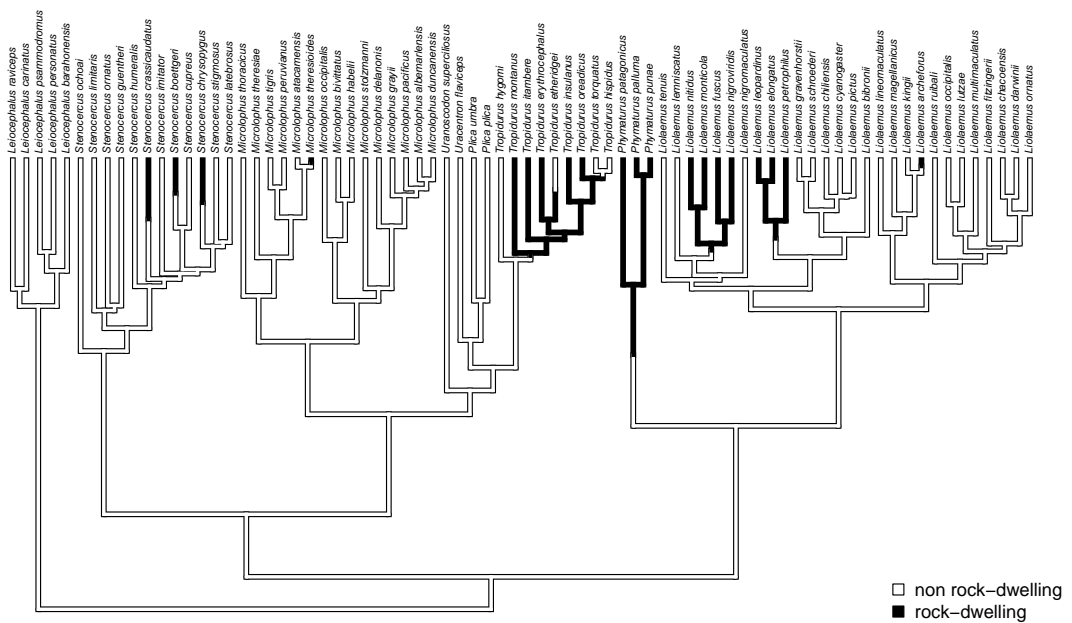

**Figure 2.** Phylogenetic tree of 76 South American iguanian lizard species based on Pyron et al. (2013). Colors indicate two different mapped ecological regimes: rock-dwelling (in black) and non rock-dwelling (white). The tree has been rescaled to have a total depth of 1.0.

146 To set our regimes, we used a single Maximum Parsimony reconstruction of the discrete trait (rock-  
 147 vs. non rock-dwelling) on our phylogeny, in which we fixed all transitions between regimes to be located  
 148 at the precise midpoint of each edge containing a state change in our reconstruction. In an empirical  
 149 study, we would probably recommend using multiple reconstructions from a statistical method such as

150 *stochastic character mapping* (Huelsenbeck et al., 2003), and then averaging the results across stochastic  
 151 maps (e.g., O'Meara et al., 2006; but see Revell, 2013). Our lizard phylogeny with mapped regimes is  
 152 shown in Figure 2.

153 We next fit all eight of the models listed in Table 1 to a dataset consisting of body size and relative  
 154 body dorsoventral depth from Toyama (2017), both calculated using geometrical definitions for size and  
 155 shape (Mosimann, 1970; Klingenberg, 2016). Since rock-dwelling has previously been suggested to favor  
 156 the evolution of dorsoventral flattening (e.g., Revell et al., 2007; Goodman et al., 2008), we hypothesized  
 157 that the evolutionary correlation between body size and depth, while generally positive across this group,  
 158 could decrease or become negative in rock-dwelling forms due to ecological selection to decouple body  
 159 depth from size. In Table 2, we show the parameter estimates, model fits, and Akaike weights (see section  
 160 below) of the top-four best-supported models from this analysis.

**Table 2.** Model rank, model name, model parameter estimates, log-likelihood,  $\log(L)$ , AIC, and Akaike weights for the top four heterogeneous rate or correlation multivariate Brownian evolution models fit to overall size and relative body depth in South American iguanian lizards (Figure 2). Column headers are as in Table 1, except for  $w$ , which indicates Akaike weight as calculated using equation (4).

| Rank | Model    | $\sigma_{1,1}^2$ | $\sigma_{1,2}^2$ | $\sigma_{2,1}^2$ | $\sigma_{2,2}^2$ | $r_1$ | $r_2$ | $\log(L)$ | AIC    | $w$  |
|------|----------|------------------|------------------|------------------|------------------|-------|-------|-----------|--------|------|
| 1    | model 3  | 0.23             | –                | 0.06             | –                | 0.34  | -0.31 | 55.11     | -98.22 | 0.28 |
| 2    | model 3c | 0.23             | –                | 0.05             | 0.10             | 0.33  | -0.31 | 56.04     | -98.08 | 0.26 |
| 3    | model 3b | 0.21             | 0.27             | 0.06             | –                | 0.33  | -0.32 | 55.32     | -96.63 | 0.13 |
| 4    | model 4  | 0.21             | 0.28             | 0.05             | 0.10             | 0.32  | -0.34 | 56.29     | -96.58 | 0.12 |

161 Although the weight of evidence is distributed among our top four models in the table, the most  
 162 notable aspect of *all* of the best-supported models for these data is that they each allow the evolutionary  
 163 correlation ( $r$ ) to differ between the two different mapped regimes on the tree. Models that don't allow  
 164 the evolutionary correlation to differ by regime (models 1, 2, 2b, and 2c from Table 1) each received  
 165 less than 10% support.

166 We also found that the evolutionary correlation between body size and size-adjusted body depth  
 167 was positive in non rock-dwelling lizards, indicating that larger lizards tended to evolve proportionally  
 168 greater body depth (Table 2). By contrast, rock-dwelling forms actually exhibited a *negative* evolutionary  
 169 correlation between body size and size-adjusted body depth. This is because larger rock-dwelling animals  
 170 do not tend to evolve proportionally greater body depths. To the contrary, their size-adjusted body depth  
 171 actually *decreases*. This is largely consistent with what's expected given behavioral and biomechanical  
 172 considerations (Revell et al., 2007; Goodman et al., 2008).

### 173 A small simulation test of the method

174 In addition to the empirical applications given above, we tested the method using a small simulation  
 175 experiment as follows. We first generated twenty 100-taxon pure-birth random phylogenetic trees. On  
 176 each of these trees, we simulated the history of a three-state discrete character. We rejected and repeated  
 177 any simulation in which any of the three states of the trait was not observed in at least twenty tips. An  
 178 example simulated tree with evolutionary regimes is given in Figure 3a.

179 For all of the twenty random trees, we simulated data under each of the eight models of Table 1. To  
 180 begin each simulation, we first drew values for  $\log(\sigma_1^2)$  and  $\log(\sigma_2^2)$  for the two traits from a standard  
 181 normal distribution (that is to say,  $\sigma_1^2$  and  $\sigma_2^2$  were randomly sampled from a log-normal distribution);  
 182 and we drew a random value or values of the correlation coefficient ( $r$ ) from a uniform distribution on  
 183 the interval  $-1$  to  $1$ . Naturally, we sampled different numbers of values for  $\log(\sigma_1^2)$ ,  $\log(\sigma_2^2)$ , and  $r$   
 184 depending on the model that was being used for simulation. For instance, a model with three mapped  
 185 regimes (e.g., Figure 3a) and different rates for trait 1, equal rates for trait 2, and different correlations  
 186 between traits 1 and 2, would involve randomly sampling three values for  $\log(\sigma_1^2)$ , one value for  $\log(\sigma_2^2)$ ,  
 187 and three values for  $r$  from their respective distributions. Our simulation procedure doesn't fix any specific  
 188 difference in the rates or evolutionary correlations between regimes. Nonetheless, it will *on average* result  
 189 in a geometric mean *ratio* of the highest evolutionary rate over the lowest (for any variable  $\sigma^2$  simulation)  
 190 of around 5.4; and a mean *difference* between the highest evolutionary correlation and the lowest (for any  
 191 variable  $r$  simulation) of about 1.0.

192 An example simulated dataset generated using our procedure for different rates (trait 1), and different  
 193 correlations (model 3b) is shown in Figure 3b. In this example, we simulated the data using an evolutionary  
 194 correlation between traits  $x_1$  and  $x_2$  that was negative for regimes 1 and 3, but *positive* for regime 2 (Figure  
 195 3b).

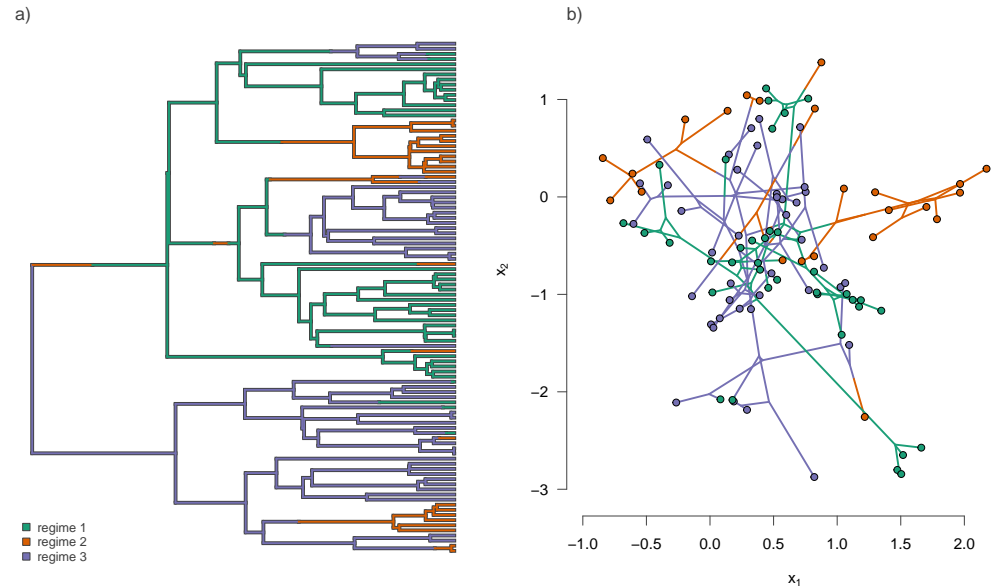

**Figure 3.** a) Example simulated phylogenetic tree with three mapped evolutionary regimes. b) The phylogeny of panel (a) projected into a two dimensional phenotypic trait space. The trait data in panel (b) were simulated under model 3b from Table 1 (different rates in trait 1, different correlations), in which the simulated evolutionary correlation between traits  $x_1$  and  $x_2$  was negative in regimes 1 and 3, but positive in regime 2.

196 After completing the numerical simulations, we then proceeded to fit each of the same eight models to  
 197 each simulated dataset. For each fitted model, we computed AIC and Akaike weights as follows (Akaike,  
 198 1974; Burnham and Anderson, 2002).

$$AIC_i = 2k - 2\ln(l_i) \quad w_i = \frac{e^{-\Delta AIC_i/2}}{\sum e^{-\Delta AIC_j/2}} \quad (4)$$

199 Here,  $AIC_i$  is the value of AIC for the  $i$ th model;  $k$  is the number of parameters in the model;  $\ln(l_i)$   
 200 is the log-likelihood of the  $i$ th model; and  $\Delta AIC_i$  is the difference in AIC between the  $i$ th model and the  
 201 model with the minimum AIC score in the set. In general, we should prefer the model with the lowest  
 202 overall value for AIC, and can interpret the Akaike model weights ( $w$ ), from equation (4), as a measure  
 203 of the strength of evidence supporting each of the models in our set (Akaike, 1974; Wagenmakers and  
 204 Farrell, 2004).

205 After fitting all eight models to each of our  $20 \times 8 = 160$  simulated datasets, we next simply calculated  
 206 the fraction of times in which the generating model was selected as the ‘best’ model (as well as second  
 207 best, third best, and so on). These results are summarized in Table 3. In general, we found that the  
 208 generating model tended to be selected as the best or second best model over 86% of the time in simulation,  
 209 under the simulation conditions described above (Table 3).

210 In addition, we also calculated the average weight ( $\bar{w}$ ) of each of the twenty datasets for each model.  
 211 These results are summarized in Figure 4. This analysis shows that the generating model (in rows) also  
 212 tended to have the highest average Akaike model weight (in columns; Figure 4).

**Table 3.** Model name and the fraction of times from twenty simulations in which the generating model was identified as the best, 2nd best, 3rd best, or worse than third best model using AIC model selection.

| Model name | Best | 2nd best | 3rd best | ≥4th |
|------------|------|----------|----------|------|
| model 1    | 0.65 | 0.15     | 0.05     | 0.15 |
| model 2    | 0.70 | 0.20     | 0.05     | 0.05 |
| model 2b   | 0.65 | 0.10     | 0.15     | 0.10 |
| model 2c   | 0.80 | 0.10     | 0.10     | 0.00 |
| model 3    | 0.75 | 0.15     | 0.05     | 0.05 |
| model 3b   | 0.75 | 0.15     | 0.05     | 0.05 |
| model 3c   | 0.40 | 0.35     | 0.20     | 0.05 |
| model 4    | 0.65 | 0.35     | 0.00     | 0.00 |

213 For each generating model, the next highest average Akaike model weights tended to be observed  
 214 in models of similar complexity. For instance, when the generating model was model 4 (no common  
 215 structure), we found the *highest* average model weight for model 4 (0.65); and then the next highest  
 216 average model weights for models 3b (different rates for trait 1, different correlations; 0.14) and 3c  
 217 (different rates for trait 2, different correlations; 0.13). Conversely, when the generating model was model  
 218 1 (common rates, common correlation), we found the highest average model weight for model 1 (0.37),  
 219 and the next highest average model weight for model 3 (common rates, different correlation; 0.14).

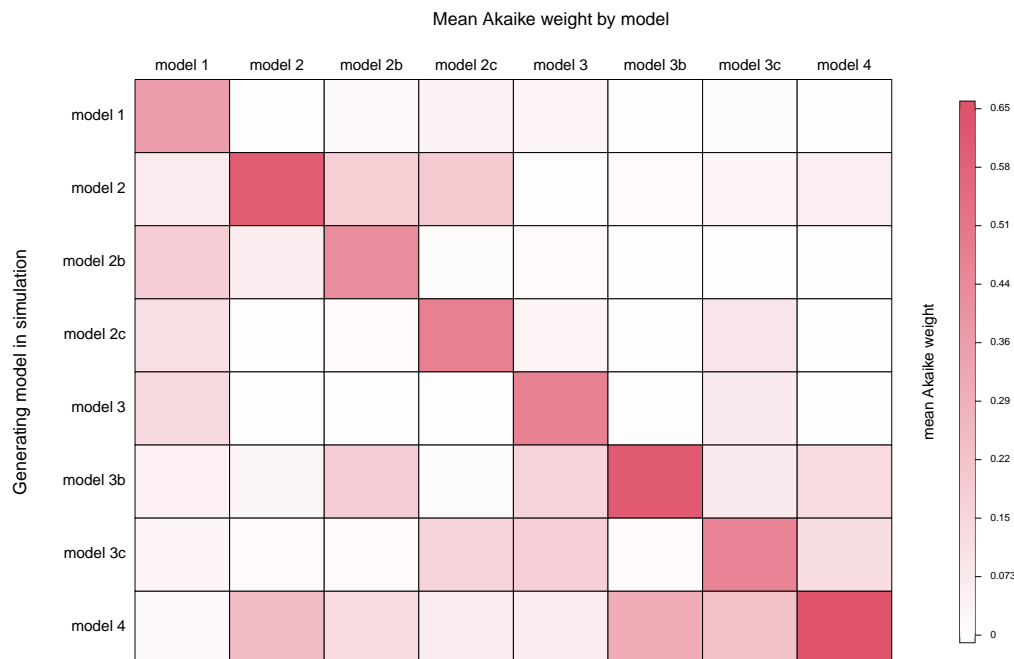

**Figure 4.** Mean Akaike weight for all eight models (in columns) for each of the eight generating models (in rows). Simulation conditions were as described in the text.

## 220 Notes on implementation

221 The model and methods of this study have been implemented for the R statistical computing environment  
 222 (R Core Team, 2021), and all simulations and analyses for this study were done using R.

223 The method that we describe in the article is implemented as the function *evolvcv.lite* of the *phytools*  
 224 R package (Revell, 2012). *phytools* in turn depends on the important R phylogenetics packages *ape*  
 225 (Paradis and Schliep, 2019) and *phangorn* (Schliep, 2011), as well as on a number of other R libraries



226 (Venables and Ripley, 2002; Ligges and Mächler, 2003; Lemon, 2006; Plummer et al., 2006; Chasalow,  
227 2012; Becker et al., 2018; Gilbert and Varadhan, 2019; Azzalini and Genz, 2020; Qiu and Joe, 2020;  
228 Warnes et al., 2020; Goulet et al., 2021; Pinheiro et al., 2021).

## 229 **DISCUSSION**

230 The evolutionary correlation is defined as the tendency of two different phenotypic traits to co-evolve  
231 (Harmon, 2019). Traits are said to have a positive evolutionary correlation if a large increase in the value  
232 of one trait tends to be accompanied by a similarly large increase in the second, and *vice versa*. Traits  
233 can be evolutionarily correlated for a wide variety of reasons. For instance, a genetic correlation between  
234 traits, if persistent over macroevolutionary time periods, will tend to cause two phenotypic characteristics  
235 to evolve in a correlated fashion, even under genetic drift (Schluter, 1996; Blows and Hoffmann, 2005;  
236 Hohenlohe and Arnold, 2008; Revell and Harmon, 2008). Genetic correlations between traits in turn tend  
237 to be caused by pleiotropy, such as when one quantitative trait locus affects the expressed value of two  
238 different phenotypic attributes (e.g., Gardner and Latta, 2007).

239 More often, however, when an evolutionary correlation between traits is observed, natural selection  
240 tends to be purported. For instance, the evolutionary correlation between water-related plant traits  
241 observed by Sun et al. (2020) was interpreted by the authors as evidence for natural selection acting to  
242 favor certain combinations of trait values over others. Likewise, when Goodwillie et al. (2009) found an  
243 evolutionary correlation between reproductive outcrossing rate and the product of flower number and size  
244 in plants, they hypothesized that this was due to selection favoring increased investment in structures to  
245 attract pollinators in outcrossing compared to selfing taxa. Numerous questions in evolutionary research  
246 involve measuring the evolutionary correlations between traits (Felsenstein, 1985; Harmon, 2019), and in  
247 many cases it may be sufficient to fit a single value of the evolutionary correlation between characters for  
248 all the branches and nodes of the phylogeny. Under other circumstances, however, it's useful or necessary  
249 to permit the evolutionary correlation to assume different values in different parts of the tree.

250 For example, in the present study we used data for centrarchid fishes to test whether feeding mode  
251 influences the evolutionary tendency of two different aspects of the buccal morphology to co-evolve  
252 (Revell and Collar, 2009). We hypothesized that natural selection for functional integration of the feeding  
253 apparatus constrains different buccal traits to evolve in a coordinated fashion in piscivorous lineages,  
254 but not in their non-piscivorous kin (Collar et al., 2005). Indeed, our analysis reiterates the finding of  
255 Revell and Collar (2009) in showing that a model with different evolutionary correlations between traits  
256 depending on feeding mode significantly better explains our morphological trait data, compared to a  
257 model in which the evolutionary correlation is forced to have a constant value across all the branches of  
258 the phylogeny. Like Revell and Collar (2009), we also found that the evolutionary correlation between  
259 buccal traits is high and positive in piscivorous but not non-piscivorous lineages (Table 1). Unlike Revell  
260 and Collar (2009), however, we found that the best-supported model was one in which the evolutionary  
261 rate ( $\sigma^2$ ) for buccal length, but *not* gape width, was also free to differ in different parts of the phylogeny.

262 Likewise, we present data for the evolution of overall body size and size-adjusted dorsoventral body  
263 depth in South American iguanian rock-dwelling and non rock-dwelling lizards, a group rich in habitat  
264 transitions (Figure 2; Toyama, 2017). Based on prior research (Revell et al., 2007; Goodman et al., 2008),  
265 we hypothesized that selection might favor the decoupling of a normally positive evolutionary correlation  
266 between the two traits to permit the evolution of greater dorsoventral compression in rock-dwelling species.  
267 Indeed, all four of the best-fitting models in our analysis were ones in which the evolutionary correlation  
268 was permitted to differ by habitat use: rock or non-rock (Table 2). Models where the evolutionary rates  
269 ( $\sigma^2$ ), but not the evolutionary correlation ( $r$ ), differed across the tree received very little support.

270 Finally, we undertook a small simulation study of our method. We found that the generating model in  
271 simulation also tended to be the model that was most often chosen via our model selection procedure (Table  
272 3; Figure 4). When the generating model *was not* best-supported, a model of similar parameterization  
273 tended to be selected instead (Figure 4).

## 274 **Relationship to other methods**

275 Readers of this article who are familiar with phylogenetic comparative methods might observe that it's  
276 also possible to model multivariate trait evolution in which the relationship between traits changes as a  
277 function of a discrete factor using a phylogenetic generalized analysis of covariance (Grafen, 1989; Rohlf,  
278 2001; Revell, 2010; Mundry, 2014; Fuentes-G. et al., 2016).

279 In this case, we'd simply fit a linear model in which a single dependent variable ( $y$ ) varied as a  
280 function of a discrete factor (the tip regime), a continuous variable ( $x$ ), and their interaction (to permit  
281 differences in slope between regimes), while assuming that the residual error in  $y$  has a multivariate  
282 normal distribution given by the structure of the tree (Rohlf, 2001; Revell, 2010; Fuentes-G. et al., 2016).  
283 Indeed, this is a valid approach for asking how the relationship between traits changes among lineages  
284 of a reconstructed phylogeny. We nonetheless feel that our method adds value for many investigators  
285 because it permits an arbitrary (not just tip) mapping of discrete regimes, because it doesn't require the  
286 user to specify dependent and independent variables in the model, because it easily allows us to take  
287 into account sampling error in the estimation of species' means (following Ives et al., 2007), because  
288 it's readily extensible to more than two traits whose correlations might also be expected to change as  
289 a function of the mapped regimes, and, finally, because it's more directly connected to a hypothesized  
290 evolutionary process for the traits on our phylogeny (Hohenlohe and Arnold, 2008; Revell and Harmon,  
291 2008).

## 292 **Conclusions**

293 The evolutionary correlation is defined as the tendency for changes in one phenotypic attribute to be  
294 associated (positively or negatively) with changes in a second trait through evolutionary time or on  
295 a phylogenetic tree (Harmon, 2019). Many questions in phylogenetic comparative biology involve  
296 measuring the evolutionary correlations between characters using phylogenies. Often, it's sufficient to  
297 assume a constant value of this evolutionary correlation through time or among clades. Here, however,  
298 we present a hierarchical series of models in which we permit the rate of evolution for traits, *and* their  
299 evolutionary correlation, to differ in different parts of the phylogeny that have been specified *a priori* by  
300 the investigator.

## 301 **ACKNOWLEDGMENTS**

302 This research was funded by grants from the National Science Foundation (DBI-1759940) and FONDE-  
303 CYT, Chile (1201869), to LJR; and a Natural Sciences and Engineering Research Council of Canada  
304 Discovery Grant (RGPIN-2015-04334), to DLM.

## 305 **REFERENCES**

- 306 Adams, D. C. (2013). Comparing evolutionary rates for different phenotypic traits on a phylogeny using  
307 likelihood. *Systematic Biology*, 62(2):181–192.
- 308 Akaike, H. (1974). A new look at the statistical model identification. *IEEE Transactions on Automatic*  
309 *Control*, 19(6):716–723.
- 310 Azzalini, A. and Genz, A. (2020). *The R package mnormt: The multivariate normal and t distributions*.  
311 R package version 2.0.2.
- 312 Becker, R. A., Wilks, A. R., Brownrigg, R., Minka, T. P., and Deckmyn, A. (2018). *maps: Draw*  
313 *Geographical Maps*. R package version 3.3.0.
- 314 Blows, M. W. and Hoffmann, A. A. (2005). A reassessment of genetic limits to evolutionary change.  
315 *Ecology*, 86(6):1371–1384.
- 316 Burnham, K. P. and Anderson, D. R. (2002). *Model selection and multimodel inference : a practical*  
317 *information-theoretic approach*. Springer, New York.
- 318 Caetano, D. S. and Harmon, L. J. (2017). ratematrix: An R package for studying evolutionary integration  
319 among several traits on phylogenetic trees. *Methods in Ecology and Evolution*, 8(12):1920–1927.
- 320 Chasalow, S. (2012). *combinat: combinatorics utilities*. R package version 0.0-8.
- 321 Clavel, J., Escarguel, G., and Merceron, G. (2015). mvMORPH: an R package for fitting multivariate  
322 evolutionary models to morphometric data. *Methods in Ecology and Evolution*, 6:1311–1319.
- 323 Collar, D. C., Near, T. J., and Wainwright, P. C. (2005). Comparative analysis of morphological diversity:  
324 Does disparity accumulate at the same rate in two lineages of centrarchid fishes? *Evolution*, 59(8):1783–  
325 1794.
- 326 Damian-Serrano, A., Haddock, S. H. D., and Dunn, C. W. (2021). The evolution of siphonophore tentilla  
327 for specialized prey capture in the open ocean. *Proceedings of the National Academy of Sciences*,  
328 118(8):e2005063118.
- 329 Felsenstein, J. (1985). Phylogenies and the comparative method. *The American Naturalist*, 125(1):1–15.

- 330 Fuentes-G., J. A., Housworth, E. A., Weber, A., and Martins, E. P. (2016). Phylogenetic ANCOVA:  
331 Estimating changes in evolutionary rates as well as relationships between traits. *The American*  
332 *Naturalist*, 188(6):615–627.
- 333 Gardner, K. M. and Latta, R. G. (2007). Shared quantitative trait loci underlying the genetic correlation  
334 between continuous traits. *Molecular Ecology*, 16(20):4195–4209.
- 335 Garland, T., Harvey, P. H., and Ives, A. R. (1992). Procedures for the analysis of comparative data using  
336 phylogenetically independent contrasts. *Systematic Biology*, 41(1):18–32.
- 337 Gilbert, P. and Varadhan, R. (2019). *numDeriv: Accurate Numerical Derivatives*. R package version  
338 2016.8-1.1.
- 339 Goodman, B. A., Miles, D. B., and Schwarzkopf, L. (2008). Life on the rocks: habitat use drives  
340 morphological and performance evolution in lizards. *Ecology*, 89(12):3462–3471.
- 341 Goodwillie, C., Sargent, R. D., Eckert, C. G., Elle, E., Geber, M. A., Johnston, M. O., Kalisz, S., Moeller,  
342 D. A., Ree, R. H., Vallejo-Marin, M., and Winn, A. A. (2009). Correlated evolution of mating system  
343 and floral display traits in flowering plants and its implications for the distribution of mating system  
344 variation. *New Phytologist*, 185(1):311–321.
- 345 Goulet, V., Dutang, C., Maechler, M., Firth, D., Shapira, M., and Stadelmann, M. (2021). *expm: Matrix*  
346 *Exponential, Log, 'etc'*. R package version 0.999-6.
- 347 Grafen, A. (1989). The phylogenetic regression. *Philosophical Transactions of the Royal Society of*  
348 *London. B, Biological Sciences*, 326(1233):119–157.
- 349 Harmon, L. (2019). *Phylogenetic Comparative Methods*. Independent, Open Textbook Library, Min-  
350 neapolis.
- 351 Hohenlohe, P. A. and Arnold, S. J. (2008). MIPoD: A hypothesis-testing framework for microevolutionary  
352 inference from patterns of divergence. *The American Naturalist*, 171(3):366–385.
- 353 Huelsenbeck, J. P., Nielsen, R., and Bollback, J. P. (2003). Stochastic mapping of morphological characters.  
354 *Systematic Biology*, 52(2):131–158.
- 355 Ives, A. R., Midford, P. E., and Garland, T. (2007). Within-species variation and measurement error in  
356 phylogenetic comparative methods. *Systematic Biology*, 56(2):252–270.
- 357 Klingenberg, C. P. (2016). Size, shape, and form: concepts of allometry in geometric morphometrics.  
358 *Development Genes and Evolution*, 226(3):113–137.
- 359 Lemon, J. (2006). Plotrix: a package in the red light district of r. *R-News*, 6(4):8–12.
- 360 Ligges, U. and Mächler, M. (2003). Scatterplot3d - an r package for visualizing multivariate data. *Journal*  
361 *of Statistical Software*, 8(11):1–20.
- 362 Mosimann, J. E. (1970). Size allometry: Size and shape variables with characterizations of the lognormal  
363 and generalized gamma distributions. *Journal of the American Statistical Association*, 65(330):930–  
364 945.
- 365 Mundry, R. (2014). Statistical issues and assumptions of phylogenetic generalized least squares. In  
366 *Modern Phylogenetic Comparative Methods and Their Application in Evolutionary Biology*, pages  
367 131–153. Springer Berlin Heidelberg.
- 368 Near, T. J., Bolnick, D. I., and Wainwright, P. C. (2005). Fossil calibrations and molecular divergence  
369 time estimates in centrarchid fishes (Teleostei: Centrarchidae). *Evolution*, 59(8):1768–1782.
- 370 O'Meara, B. C. (2012). Evolutionary inferences from phylogenies: A review of methods. *Annual Review*  
371 *of Ecology, Evolution, and Systematics*, 43(1):267–285.
- 372 O'Meara, B. C., Ané, C., Sanderson, M. J., and Wainwright, P. C. (2006). Testing for different rates of  
373 continuous trait evolution using likelihood. *Evolution*, 60(5):922–933.
- 374 Paradis, E. and Schliep, K. (2019). ape 5.0: an environment for modern phylogenetics and evolutionary  
375 analyses in R. *Bioinformatics*, 35:526–528.
- 376 Pinheiro, J., Bates, D., DebRoy, S., Sarkar, D., and R Core Team (2021). *nlme: Linear and Nonlinear*  
377 *Mixed Effects Models*. R package version 3.1-152.
- 378 Plummer, M., Best, N., Cowles, K., and Vines, K. (2006). CODA: Convergence diagnosis and output  
379 analysis for mcmc. *R News*, 6(1):7–11.
- 380 Pyron, R., Burbrink, F. T., and Wiens, J. J. (2013). A phylogeny and revised classification of squamata,  
381 including 4161 species of lizards and snakes. *BMC Evolutionary Biology*, 13(1):93.
- 382 Qiu, W. and Joe, H. (2020). *clusterGeneration: Random Cluster Generation (with Specified Degree of*  
383 *Separation)*. R package version 1.3.7.
- 384 R Core Team (2021). *R: A Language and Environment for Statistical Computing*. R Foundation for

- 385       Statistical Computing, Vienna, Austria.
- 386 Revell, L. J. (2010). Phylogenetic signal and linear regression on species data. *Methods in Ecology and*  
387 *Evolution*, 1(4):319–329.
- 388 Revell, L. J. (2012). phytools: an r package for phylogenetic comparative biology (and other things).  
389 *Methods in Ecology and Evolution*, 3(2):217–223.
- 390 Revell, L. J. (2013). A comment on the use of stochastic character maps to estimate evolutionary rate  
391 variation in a continuously valued trait. *Systematic Biology*, 62(2):339–345.
- 392 Revell, L. J. (2021). A variable-rate quantitative trait evolution model using penalized-likelihood.
- 393 Revell, L. J. and Collar, D. C. (2009). Phylogenetic analysis of the evolutionary correlation using  
394 likelihood. *Evolution*, 63(4):1090–1100.
- 395 Revell, L. J. and Harmon, L. J. (2008). Testing quantitative genetic hypotheses about the evolutionary  
396 rate matrix for continuous characters. *Evolutionary Ecology Research*, 10:311–331.
- 397 Revell, L. J., Harmon, L. J., and Collar, D. C. (2008). Phylogenetic signal, evolutionary process, and rate.  
398 *Systematic Biology*, 57(4):591–601.
- 399 Revell, L. J., Johnson, M. A., Schulte, J. A., Kolbe, J. J., and Losos, J. B. (2007). A phylogenetic test for  
400 adaptive convergence in rock-dwelling lizards. *Evolution*, 61(12):2898–2912.
- 401 Rohlf, F. J. (2001). Comparative methods for the analysis of continuous variables: Geometric interpreta-  
402 tions. *Evolution*, 55(11):2143–2160.
- 403 Ruiz-Robledo, J. and Villar, R. (2005). Relative growth rate and biomass allocation in ten woody  
404 species with different leaf longevity using phylogenetic independent contrasts (PICs). *Plant Biology*,  
405 7(5):484–494.
- 406 Schliep, K. P. (2011). phangorn: phylogenetic analysis in r. *Bioinformatics*, 27(4):592–593.
- 407 Schluter, D. (1996). Adaptive radiation along genetic lines of least resistance. *Evolution*, 50(5):1766.
- 408 Sun, M., Feng, C.-H., Liu, Z.-Y., and Tian, K. (2020). Evolutionary correlation of water-related traits  
409 between different structures of dendrobium plants. *Botanical Studies*, 61(1).
- 410 Thomas, G. H., Freckleton, R. P., and Székely, T. (2006). Comparative analyses of the influence of  
411 developmental mode on phenotypic diversification rates in shorebirds. *Proceedings of the Royal Society*  
412 *B: Biological Sciences*, 273(1594):1619–1624.
- 413 Toyama, K. S. (2017). Interaction between morphology and habitat use: A large-scale approach in  
414 tropidurinae lizards. *Breviora*, 554(1):1.
- 415 Venables, W. N. and Ripley, B. D. (2002). *Modern Applied Statistics with S*. Springer, New York, fourth  
416 edition. ISBN 0-387-95457-0.
- 417 Wagenmakers, E.-J. and Farrell, S. (2004). AIC model selection using akaike weights. *Psychonomic*  
418 *Bulletin & Review*, 11(1):192–196.
- 419 Warnes, G. R., Bolker, B., and Lumley, T. (2020). *gtools: Various R Programming Tools*. R package  
420 version 3.8.2.
